# Supplementary material
Source: PubMed Central journal article supplement (PMC3984989)
Supplement: mmc1.pdf [file mmc1.pdf]

## Supporting Materials

### Probing the U-shaped Conformation of Caveolin-1 in a Bilayer

Huan Rui,<sup>¶‡</sup> Kyle T. Root,<sup>‡‡</sup> Jinwoo Lee,<sup>†</sup> Kerney Jebrell Glover,<sup>†</sup> and Wonpil Im<sup>¶\*</sup>

<sup>¶</sup>Department of Molecular Biosciences and Center for Bioinformatics, The University of Kansas, Lawrence, KS and

<sup>†</sup>Department of Chemistry, Lehigh University, Bethlehem, PA

Keywords: Caveolae; Membrane protein conformation and orientation; Protein-lipid interactions

---

\*Corresponding authors:

Wonpil Im: wonpil@ku.edu

Kerney Jebrell Glover: kjg206@lehigh.edu

**TABLE S1.** Average values of the conformational parameters ( $\theta$ ,  $\phi$ ,  $\rho_1$ ,  $\rho_2$ ,  $Z_{\text{COM}}$ ,  $\alpha$ , and  $\beta$ ) of Cav1<sub>82-136</sub>.

|             | $\theta$ | $\phi$  | $\rho_1$  | $\rho_2$  | $Z_{\text{G108}}$ [Å] | $Z_{\text{I109}}$ [Å] | $Z_{\text{P110}}$ [Å] | $\alpha$ | $\beta$ |
|-------------|----------|---------|-----------|-----------|-----------------------|-----------------------|-----------------------|----------|---------|
| 45_1        | 44°±4°   | 39°±6°  | 353°±14°  | 325°±11°  | -6.0±2.1              | -7.5±2.3              | -9.7±2.1              | 101°±5°  | 63°±6°  |
| 45_2        | 63°±11°  | 14°±7°  | 334°±17°  | 116°±10°  | -6.5±2.0              | -7.1±1.9              | -8.3±1.9              | 109°±7°  | 51°±9°  |
| 45_3        | 34°±3°   | 24°±8°  | 34°±10°   | 330°±9°   | 0.7±2.3               | -0.4±2.1              | 2.0±2.2               | 49°±7°   | 46°±7°  |
| 45_4        | 12°±5°   | 28°±7°  | 327°±14°  | 328°±12°  | -5.4±2.6              | -7.7±2.7              | -8.8±2.7              | 76°±6°   | 66°±5°  |
| 45_5        | 44°±5°   | 45°±6°  | 197°±13°  | 61°±11°   | -7.8±1.9              | -4.8±1.8              | -6.2±1.7              | 115°±7°  | 71°±10° |
| 45_6        | 62°±6°   | 6°±4°   | 324°±23°  | 137°±20°  | -6.4±1.9              | -7.0±2.0              | -8.1±1.8              | 109°±6°  | 49°±6°  |
| 45_7        | 30°±3°   | 7°±5°   | 41°±9°    | 341°±9°   | -5.0±2.0              | -4.7±2.0              | -5.1±2.0              | 64°±6°   | 60°±6°  |
| 45_8        | 45°±5°   | 6°±4°   | 335°±16°  | 288°±13°  | -5.3±2.2              | -8.0±2.3              | -8.7±2.2              | 96°±5°   | 52°±4°  |
| 45_9        | 47°±9°   | 14°±6°  | 347°±15°  | 111°±12°  | -5.4±1.9              | -6.1±1.8              | -8.8±1.8              | 90°±11°  | 45°±5°  |
| 45_10       | 29°±3°   | 13°±4°  | 217°±28°  | 112°±8°   | -5.5±1.6              | -4.7±1.6              | -4.5±1.6              | 73°±6°   | 68°±6°  |
| Avg. ± S.E. | 41°±15°  | 20°±13° | 251°±118° | 215°±109° | -5.3±2.1              | -5.8±2.2              | -6.6±3.3              | 88°±21°  | 57°±9°  |
| 55_1        | 66°±12°  | 18°±6°  | 262°±19°  | 308°±13°  | -5.2±2.0              | -7.3±1.8              | -8.0±1.9              | 121°±9°  | 55°±8°  |
| 55_2        | 27°±5°   | 22°±5°  | 318°±10°  | 17°±11°   | -8.9±1.9              | -6.8±1.9              | -7.7±2.0              | 84°±5°   | 63°±5°  |
| 55_3        | 51°±5°   | 31°±5°  | 282°±15°  | 278°±9°   | -5.8±1.6              | -6.3±1.7              | -5.5±1.8              | 120°±6°  | 73°±7°  |
| 55_4        | 59°±6°   | 25°±8°  | 354°±14°  | 334°±14°  | -3.4±2.0              | -4.0±1.8              | -5.0±1.7              | 106°±5°  | 47°±5°  |
| 55_5        | 59°±7°   | 26°±9°  | 204°±16°  | 76°±25°   | -9.4±2.3              | -7.1±2.4              | -7.6±2.2              | 115°±10° | 56°±9°  |
| 55_6        | 26°±7°   | 10°±6°  | 218°±14°  | 293°±18°  | -6.9±2.3              | -7.1±2.1              | -6.2±2.0              | 80°±9°   | 55°±8°  |
| 55_7        | 45°±7°   | 5°±4°   | 231°±18°  | 294°±12°  | -6.5±2.0              | -7.6±2.0              | -7.8±2.0              | 98°±8°   | 54°±6°  |
| 55_8        | 61°±8°   | 23°±5°  | 191°±16°  | 103°±15°  | -7.2±1.8              | -5.6±2.2              | -6.4±2.3              | 105°±10° | 45°±9°  |
| 55_9        | 51°±9°   | 27°±8°  | 343°±13°  | 345°±12°  | -2.8±2.2              | -3.6±2.1              | -4.7±1.9              | 96°±7°   | 45°±6°  |
| 55_10       | 23°±4°   | 17°±5°  | 344°±17°  | 274°±12°  | -5.0±1.9              | -7.1±2.0              | -7.3±2.1              | 84°±7°   | 74°±7°  |
| Avg. ± S.E. | 47°±15°  | 20°±7°  | 275°±59°  | 232°±113° | -6.1±2.0              | -6.3±1.3              | -6.6±1.2              | 101°±14° | 57°±10° |
| 65_1        | 67°±6°   | 19°±7°  | 331°±13°  | 121°±10°  | -6.4±2.0              | -7.0±1.8              | -9.5±1.9              | 108°±8°  | 42°±8°  |
| 65_2        | 67°±7°   | 21°±6°  | 343°±13°  | 104°±11°  | -7.7±1.9              | -7.3±2.1              | -8.5±2.1              | 132°±8°  | 65°±5°  |
| 65_3        | 63°±10°  | 19°±10° | 331°±12°  | 121°±11°  | -6.8±2.1              | -7.6±2.1              | -9.3±1.9              | 103°±6°  | 44°±9°  |
| 65_4        | 84°±8°   | 13°±6°  | 202°±13°  | 76°±12°   | -5.2±1.7              | -3.5±1.7              | -5.6±1.6              | 126°±5°  | 43°±8°  |

|             |         |         |          |           |           |          |           |          |         |
|-------------|---------|---------|----------|-----------|-----------|----------|-----------|----------|---------|
| 65_5        | 47°±6°  | 7°±5°   | 344°±14° | 108°±11°  | -3.9±1.8  | -4.3±1.6 | -6.7±1.6  | 97°±6°   | 51°±6°  |
| 65_6        | 49°±7°  | 16°±6°  | 59°±19°  | 61°±12°   | -2.8±2.4  | -3.7±2.2 | -6.9±2.1  | 92°±12°  | 43°±11° |
| 65_7        | 66°±6°  | 12°±7°  | 221°±12° | 133°±10°  | -9.0±2.0  | -7.1±2.0 | -6.6±1.7  | 123°±10° | 59°±8°  |
| 65_8        | 45°±7°  | 21°±8°  | 182°±18° | 112°±15°  | -5.7±2.6  | -2.9±2.6 | -3.9±2.3  | 92°±8°   | 51°±7°  |
| 65_9        | 30°±4°  | 18°±6°  | 215°±18° | 96°±8°    | -8.8±2.0  | -6.5±1.9 | -6.2±1.9  | 99°±10°  | 82°±6°  |
| 65_10       | 61°±7°  | 6°±4°   | 350°±15° | 108°±10°  | -4.5±1.9  | -5.2±1.9 | -7.7±1.8  | 101°±5°  | 40°±7°  |
| Avg. ± S.E. | 58°±14° | 15°±5°  | 257°±93° | 104°±20°  | -6.1±2.0  | -5.5±1.7 | -7.1±1.6  | 107°±14° | 52°±13° |
| 75_1        | 68°±7°  | 28°±10° | 39°±19°  | 77°±11°   | -2.9±2.2  | -3.3±2.2 | -6.4±2.2  | 107°±8°  | 39°±6°  |
| 75_2        | 58°±5°  | 12°±6°  | 339°±13° | 122°±10°  | -4.5±2.7  | -5.1±2.8 | -7.0±2.4  | 106°±8°  | 51°±7°  |
| 75_3        | 58°±7°  | 15°±8°  | 229°±12° | 108°±12°  | -8.5±1.7  | -6.9±1.8 | -7.3±1.8  | 108°±7°  | 51°±6°  |
| 75_4        | 63°±7°  | 24°±8°  | 288°±14° | 322°±15°  | -4.6±1.8  | -7.0±2.0 | -7.6±2.1  | 120°±7°  | 57°±6°  |
| 75_5        | 45°±6°  | 13°±7°  | 336°±18° | 117°±13°  | -3.5±1.9  | -4.1±2.0 | -5.7±1.9  | 97°±6°   | 55°±5°  |
| 75_6        | 65°±8°  | 65°±7°  | 323°±13° | 340°±21°  | 3.9±3.1   | 2.4±2.4  | 4.1±2.6   | 105°±14° | 41°±15° |
| 75_7        | 53°±7°  | 9°±5°   | 229°±29° | 286°±13°  | -11.0±2.4 | -9.7±2.4 | -7.8±2.8  | 108°±11° | 55°±8°  |
| 75_8        | 57°±10° | 19°±6°  | 337°±18° | 120°±14°  | -5.3±2.2  | -5.9±2.0 | -7.5±2.0  | 109°±8°  | 55°±5°  |
| 75_9        | 66°±5°  | 27°±6°  | 318°±13° | 124°±10°  | -5.3±1.6  | -6.7±1.4 | -8.8±1.5  | 104°±6°  | 42°±5°  |
| 75_10       | 79°±8°  | 29°±6°  | 353°±13° | 118°±14°  | -4.1±2.8  | -4.5±2.7 | -7.2±2.5  | 116°±9°  | 38°±6°  |
| Avg. ± S.E. | 61°±9°  | 24°±15° | 279°±90° | 173°±95°  | -4.6±3.7  | -5.1±3.0 | -6.1±3.5  | 108°±6°  | 48°±7°  |
| 85_1        | 73°±6°  | 20°±10° | 347°±16° | 16°±12°   | -4.5±2.2  | -5.3±1.9 | -5.8±1.7  | 100°±7°  | 27°±4°  |
| 85_2        | 58°±7°  | 10°±6°  | 236°±13° | 278°±17°  | -9.1±2.2  | -7.5±2.2 | -6.6±2.3  | 107°±6°  | 49°±9°  |
| 85_3        | 68°±9°  | 10°±5°  | 350°±16° | 111°±13°  | -4.3±2.2  | -4.5±2.0 | -6.5±2.2  | 104°±9°  | 37°±5°  |
| 85_4        | 75°±9°  | 49°±4°  | 280°±12° | 6°±13°    | 1.3±1.6   | -2.4±1.6 | -4.1±1.5  | 126°±6°  | 52°±9°  |
| 85_5        | 143°±9° | 27°±11° | 260°±15° | 44°±37°   | 1.7±2.4   | -0.6±2.4 | 2.1±2.4   | 145°±6°  | 6°±5°   |
| 85_6        | 74°±7°  | 37°±6°  | 310°±15° | 128°±11°  | -4.6±2.0  | -5.8±1.8 | -8.7±1.7  | 113°±9°  | 41°±6°  |
| 85_7        | 61°±5°  | 8°±5°   | 350°±18° | 121°±10°  | -3.8±2.7  | -3.8±2.3 | -5.5±2.1  | 104°±5°  | 45°±5°  |
| 85_8        | 68°±7°  | 46°±6°  | 336°±26° | 266°±15°  | 0.2±2.8   | 2.8±2.2  | 1.8±1.8   | 93°±9°   | 27°±8°  |
| 85_9        | 33°±4°  | 13°±7°  | 358°±14° | 316°±15°  | -8.0±2.1  | -9.3±2.1 | -10.2±2.0 | 88°±5°   | 57°±5°  |
| 85_10       | 48°±5°  | 18°±6°  | 79°±17°  | 43°±17°   | -3.5±2.0  | -5.6±1.9 | -8.6±1.8  | 80°±10°  | 35°±8°  |
| Avg. ± S.E. | 70°±27° | 24°±15° | 291°±81° | 133°±109° | -3.5±3.4  | -4.2±3.3 | -5.2±4.0  | 106°±18° | 38°±14° |

|                   |                             |                             |                              |                               |                |                |                |                              |                             |
|-------------------|-----------------------------|-----------------------------|------------------------------|-------------------------------|----------------|----------------|----------------|------------------------------|-----------------------------|
| Total Avg.        | $55^{\circ} \pm 20^{\circ}$ | $21^{\circ} \pm 12^{\circ}$ | $271^{\circ} \pm 92^{\circ}$ | $171^{\circ} \pm 109^{\circ}$ | $-5.1 \pm 2.9$ | $-5.4 \pm 2.5$ | $-6.3 \pm 3.0$ | $102^{\circ} \pm 17^{\circ}$ | $50^{\circ} \pm 13^{\circ}$ |
| 1- $\mu$ s Simul. | $53^{\circ} \pm 5^{\circ}$  | $27^{\circ} \pm 6^{\circ}$  | $331^{\circ} \pm 22^{\circ}$ | $124^{\circ} \pm 12^{\circ}$  | $-5.9 \pm 1.7$ | $-6.8 \pm 1.6$ | $-9.3 \pm 1.3$ | $99^{\circ} \pm 7^{\circ}$   | $49^{\circ} \pm 7^{\circ}$  |

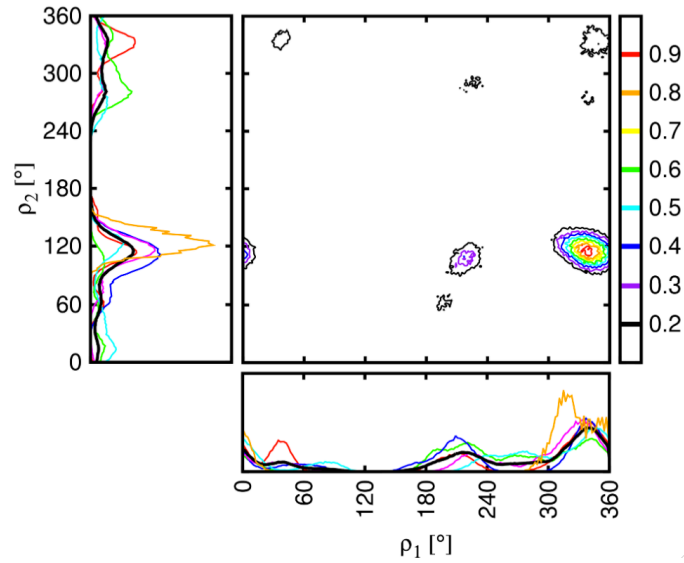

**FIGURE S1.** The average two-dimensional  $\rho_1$  and  $\rho_2$  distribution from all the multiple simulations shown as a contour map. The contour levels are indicated by different colors, and the color scale goes from black to red denoting population increase. The bottom and left panels show the distributions of  $\rho_1$  and  $\rho_2$ , respectively. The distributions from different systems are distinguished by colors with system cav1\_45 in red, cav1\_55 in green, cav1\_65 in blue, cav1\_75 in magenta, cav1\_85 in cyan, and the 1- $\mu$ s simulation in orange. The averaged one-dimensional  $\rho_1$  and  $\rho_2$  distributions from the multiple simulations are in black.

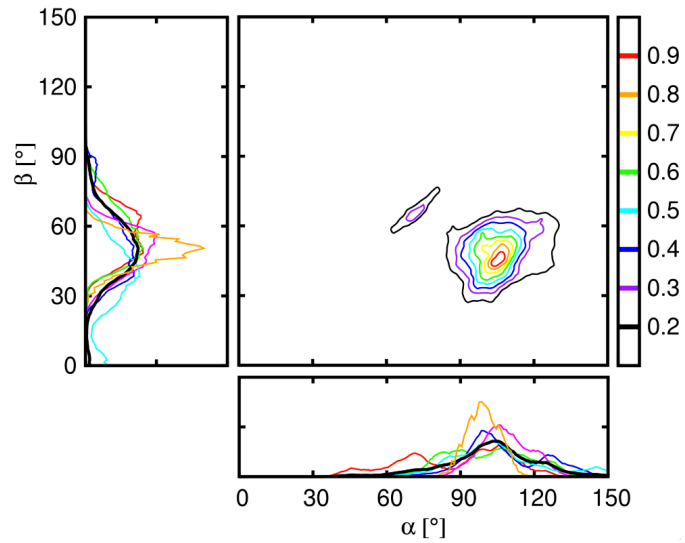

**FIGURE S2.** The average two-dimensional  $\alpha$  and  $\beta$  distribution from all the multiple simulations shown as a contour map. The contour levels are indicated by different colors, and the color scale goes from black to red denoting population increase. The bottom and left panels show the distributions of  $\alpha$  and  $\beta$ , respectively. The distributions from different systems are distinguished by colors with system cav1\_45 in red, cav1\_55 in green, cav1\_65 in blue, cav1\_75 in magenta, cav1\_85 in cyan, and the 1- $\mu$ s simulation in orange. The averaged one-dimensional  $\alpha$  and  $\beta$  distributions from the multiple simulations are in black.
